# Supplementary material for: Optimal Phase Load Balancing in Low Voltage Distribution Networks Using a Smart Meter Data-Based Algorithm
Source: Preprints.org preprint supplement (doi:10.20944/preprints202002.0314.v1), 2020-02-23
Supplement: Supplementary file 1 [file supplementary]

## Sheet: P_baza
0	0.0427714	0	0	0	0	0	0	0	0	0	0	0.188335	0	0	0	0	0	0	0.0855428	0	0	0.114024	0	0	0.0855428	0	0	0	0	0	0.0541203	0	0	0	0.0541203	0	0	0.0427714	0	0	0.128314	0	0.0541203	0	0.0427714	0.0427714	0.0427714	0	0
0	0.0413829	0	0	0	0	0	0	0	0	0	0	0.172477	0	0	0	0	0	0	0.0827658	0	0	0.11009	0	0	0.0827658	0	0	0	0	0	0.0536882	0	0	0	0.0536882	0	0	0.0413829	0	0	0.124149	0	0.0536882	0	0.0413829	0.0413829	0.0413829	0	0
0	0.0393419	0	0	0	0	0	0	0	0	0	0	0.16184	0	0	0	0	0	0	0.0786837	0	0	0.105484	0	0	0.0786837	0	0	0	0	0	0.0530499	0	0	0	0.0530499	0	0	0.0393419	0	0	0.118026	0	0.0530499	0	0.0393419	0.0393419	0.0393419	0	0
0	0.0389853	0	0	0	0	0	0	0	0	0	0	0.1686	0	0	0	0	0	0	0.0779706	0	0	0.107667	0	0	0.0779706	0	0	0	0	0	0.0502926	0	0	0	0.0502926	0	0	0.0389853	0	0	0.116956	0	0.0502926	0	0.0389853	0.0389853	0.0389853	0	0
0	0.0420227	0	0	0	0	0	0	0	0	0	0	0.17246	0	0	0	0	0	0	0.0840454	0	0	0.106257	0	0	0.0840454	0	0	0	0	0	0.0484776	0	0	0	0.0484776	0	0	0.0420227	0	0	0.126068	0	0.0484776	0	0.0420227	0.0420227	0.0420227	0	0
0	0.0421957	0	0	0	0	0	0	0	0	0	0	0.151629	0	0	0	0	0	0	0.0843913	0	0	0.0905716	0	0	0.0843913	0	0	0	0	0	0.0388131	0	0	0	0.0388131	0	0	0.0421957	0	0	0.126587	0	0.0388131	0	0.0421957	0.0421957	0.0421957	0	0
0	0.0493786	0	0	0	0	0	0	0	0	0	0	0.187071	0	0	0	0	0	0	0.0987573	0	0	0.147157	0	0	0.0987573	0	0	0	0	0	0.0403058	0	0	0	0.0403058	0	0	0.0493786	0	0	0.148136	0	0.0403058	0	0.0493786	0.0493786	0.0493786	0	0
0	0.0531658	0	0	0	0	0	0	0	0	0	0	0.234608	0	0	0	0	0	0	0.106332	0	0	0.180894	0	0	0.106332	0	0	0	0	0	0.0399277	0	0	0	0.0399277	0	0	0.0531658	0	0	0.159497	0	0.0399277	0	0.0531658	0.0531658	0.0531658	0	0
0	0.0546233	0	0	0	0	0	0	0	0	0	0	0.226525	0	0	0	0	0	0	0.109247	0	0	0.179573	0	0	0.109247	0	0	0	0	0	0.0454517	0	0	0	0.0454517	0	0	0.0546233	0	0	0.16387	0	0.0454517	0	0.0546233	0.0546233	0.0546233	0	0
0	0.0522947	0	0	0	0	0	0	0	0	0	0	0.202221	0	0	0	0	0	0	0.104589	0	0	0.155374	0	0	0.104589	0	0	0	0	0	0.0508872	0	0	0	0.0508872	0	0	0.0522947	0	0	0.156884	0	0.0508872	0	0.0522947	0.0522947	0.0522947	0	0
0	0.0545495	0	0	0	0	0	0	0	0	0	0	0.190732	0	0	0	0	0	0	0.109099	0	0	0.167745	0	0	0.109099	0	0	0	0	0	0.0566937	0	0	0	0.0566937	0	0	0.0545495	0	0	0.163648	0	0.0566937	0	0.0545495	0.0545495	0.0545495	0	0
0	0.0475337	0	0	0	0	0	0	0	0	0	0	0.175408	0	0	0	0	0	0	0.0950675	0	0	0.155396	0	0	0.0950675	0	0	0	0	0	0.0510696	0	0	0	0.0510696	0	0	0.0475337	0	0	0.142601	0	0.0510696	0	0.0475337	0.0475337	0.0475337	0	0
0	0.0486824	0	0	0	0	0	0	0	0	0	0	0.198339	0	0	0	0	0	0	0.0973647	0	0	0.156838	0	0	0.0973647	0	0	0	0	0	0.0553922	0	0	0	0.0553922	0	0	0.0486824	0	0	0.146047	0	0.0553922	0	0.0486824	0.0486824	0.0486824	0	0
0	0.0513288	0	0	0	0	0	0	0	0	0	0	0.194522	0	0	0	0	0	0	0.102658	0	0	0.149273	0	0	0.102658	0	0	0	0	0	0.057637	0	0	0	0.057637	0	0	0.0513288	0	0	0.153986	0	0.057637	0	0.0513288	0.0513288	0.0513288	0	0
0	0.0512378	0	0	0	0	0	0	0	0	0	0	0.196253	0	0	0	0	0	0	0.102476	0	0	0.147227	0	0	0.102476	0	0	0	0	0	0.0534988	0	0	0	0.0534988	0	0	0.0512378	0	0	0.153713	0	0.0534988	0	0.0512378	0.0512378	0.0512378	0	0
0	0.0487488	0	0	0	0	0	0	0	0	0	0	0.17252	0	0	0	0	0	0	0.0974976	0	0	0.126581	0	0	0.0974976	0	0	0	0	0	0.0567245	0	0	0	0.0567245	0	0	0.0487488	0	0	0.146246	0	0.0567245	0	0.0487488	0.0487488	0.0487488	0	0
0	0.0540899	0	0	0	0	0	0	0	0	0	0	0.222523	0	0	0	0	0	0	0.10818	0	0	0.147247	0	0	0.10818	0	0	0	0	0	0.0473675	0	0	0	0.0473675	0	0	0.0540899	0	0	0.16227	0	0.0473675	0	0.0540899	0.0540899	0.0540899	0	0
0	0.0624096	0	0	0	0	0	0	0	0	0	0	0.237507	0	0	0	0	0	0	0.124819	0	0	0.178322	0	0	0.124819	0	0	0	0	0	0.0521722	0	0	0	0.0521722	0	0	0.0624096	0	0	0.187229	0	0.0521722	0	0.0624096	0.0624096	0.0624096	0	0
0	0.0605743	0	0	0	0	0	0	0	0	0	0	0.226099	0	0	0	0	0	0	0.121149	0	0	0.17922	0	0	0.121149	0	0	0	0	0	0.0501949	0	0	0	0.0501949	0	0	0.0605743	0	0	0.181723	0	0.0501949	0	0.0605743	0.0605743	0.0605743	0	0
0	0.0573235	0	0	0	0	0	0	0	0	0	0	0.232823	0	0	0	0	0	0	0.114647	0	0	0.186918	0	0	0.114647	0	0	0	0	0	0.0456844	0	0	0	0.0456844	0	0	0.0573235	0	0	0.171971	0	0.0456844	0	0.0573235	0.0573235	0.0573235	0	0
0	0.0645159	0	0	0	0	0	0	0	0	0	0	0.266927	0	0	0	0	0	0	0.129032	0	0	0.238483	0	0	0.129032	0	0	0	0	0	0.052286	0	0	0	0.052286	0	0	0.0645159	0	0	0.193548	0	0.052286	0	0.0645159	0.0645159	0.0645159	0	0
0	0.0721436	0	0	0	0	0	0	0	0	0	0	0.314172	0	0	0	0	0	0	0.144287	0	0	0.242266	0	0	0.144287	0	0	0	0	0	0.0717186	0	0	0	0.0717186	0	0	0.0721436	0	0	0.216431	0	0.0717186	0	0.0721436	0.0721436	0.0721436	0	0
0	0.0663694	0	0	0	0	0	0	0	0	0	0	0.300188	0	0	0	0	0	0	0.132739	0	0	0.20216	0	0	0.132739	0	0	0	0	0	0.0804879	0	0	0	0.0804879	0	0	0.0663694	0	0	0.199108	0	0.0804879	0	0.0663694	0.0663694	0.0663694	0	0
0	0.0499088	0	0	0	0	0	0	0	0	0	0	0.209965	0	0	0	0	0	0	0.0998176	0	0	0.132195	0	0	0.0998176	0	0	0	0	0	0.0694326	0	0	0	0.0694326	0	0	0.0499088	0	0	0.149726	0	0.0694326	0	0.0499088	0.0499088	0.0499088	0	0
[truncated: 439 more columns]

## Sheet: Q_baza
0	0.0265073	0	0	0	0	0	0	0	0	0	0	0.116719	0	0	0	0	0	0	0.0530147	0	0	0.0706655	0	0	0.0530147	0	0	0	0	0	0.0335407	0	0	0	0.0335407	0	0	0.0265073	0	0	0.079522	0	0.0335407	0	0.0265073	0.0265073	0.0265073	0	0
0	0.0256468	0	0	0	0	0	0	0	0	0	0	0.106891	0	0	0	0	0	0	0.0512936	0	0	0.0682279	0	0	0.0512936	0	0	0	0	0	0.033273	0	0	0	0.033273	0	0	0.0256468	0	0	0.0769405	0	0.033273	0	0.0256468	0.0256468	0.0256468	0	0
0	0.0243819	0	0	0	0	0	0	0	0	0	0	0.100299	0	0	0	0	0	0	0.0487638	0	0	0.0653732	0	0	0.0487638	0	0	0	0	0	0.0328774	0	0	0	0.0328774	0	0	0.0243819	0	0	0.0731457	0	0.0328774	0	0.0243819	0.0243819	0.0243819	0	0
0	0.0241609	0	0	0	0	0	0	0	0	0	0	0.104489	0	0	0	0	0	0	0.0483219	0	0	0.0667261	0	0	0.0483219	0	0	0	0	0	0.0311685	0	0	0	0.0311685	0	0	0.0241609	0	0	0.0724828	0	0.0311685	0	0.0241609	0.0241609	0.0241609	0	0
0	0.0260433	0	0	0	0	0	0	0	0	0	0	0.106881	0	0	0	0	0	0	0.0520867	0	0	0.065852	0	0	0.0520867	0	0	0	0	0	0.0300437	0	0	0	0.0300437	0	0	0.0260433	0	0	0.07813	0	0.0300437	0	0.0260433	0.0260433	0.0260433	0	0
0	0.0261505	0	0	0	0	0	0	0	0	0	0	0.0939713	0	0	0	0	0	0	0.052301	0	0	0.0561312	0	0	0.052301	0	0	0	0	0	0.0240542	0	0	0	0.0240542	0	0	0.0261505	0	0	0.0784516	0	0.0240542	0	0.0261505	0.0261505	0.0261505	0	0
0	0.0306021	0	0	0	0	0	0	0	0	0	0	0.115936	0	0	0	0	0	0	0.0612043	0	0	0.0911996	0	0	0.0612043	0	0	0	0	0	0.0249793	0	0	0	0.0249793	0	0	0.0306021	0	0	0.0918064	0	0.0249793	0	0.0306021	0.0306021	0.0306021	0	0
0	0.0329492	0	0	0	0	0	0	0	0	0	0	0.145397	0	0	0	0	0	0	0.0658984	0	0	0.112108	0	0	0.0658984	0	0	0	0	0	0.024745	0	0	0	0.024745	0	0	0.0329492	0	0	0.0988477	0	0.024745	0	0.0329492	0.0329492	0.0329492	0	0
0	0.0338525	0	0	0	0	0	0	0	0	0	0	0.140388	0	0	0	0	0	0	0.067705	0	0	0.11129	0	0	0.067705	0	0	0	0	0	0.0281685	0	0	0	0.0281685	0	0	0.0338525	0	0	0.101557	0	0.0281685	0	0.0338525	0.0338525	0.0338525	0	0
0	0.0324093	0	0	0	0	0	0	0	0	0	0	0.125326	0	0	0	0	0	0	0.0648187	0	0	0.0962919	0	0	0.0648187	0	0	0	0	0	0.031537	0	0	0	0.031537	0	0	0.0324093	0	0	0.097228	0	0.031537	0	0.0324093	0.0324093	0.0324093	0	0
0	0.0338067	0	0	0	0	0	0	0	0	0	0	0.118205	0	0	0	0	0	0	0.0676134	0	0	0.103959	0	0	0.0676134	0	0	0	0	0	0.0351356	0	0	0	0.0351356	0	0	0.0338067	0	0	0.10142	0	0.0351356	0	0.0338067	0.0338067	0.0338067	0	0
0	0.0294588	0	0	0	0	0	0	0	0	0	0	0.108708	0	0	0	0	0	0	0.0589175	0	0	0.0963057	0	0	0.0589175	0	0	0	0	0	0.0316501	0	0	0	0.0316501	0	0	0.0294588	0	0	0.0883763	0	0.0316501	0	0.0294588	0.0294588	0.0294588	0	0
0	0.0301706	0	0	0	0	0	0	0	0	0	0	0.12292	0	0	0	0	0	0	0.0603412	0	0	0.0971993	0	0	0.0603412	0	0	0	0	0	0.034329	0	0	0	0.034329	0	0	0.0301706	0	0	0.0905119	0	0.034329	0	0.0301706	0.0301706	0.0301706	0	0
0	0.0318107	0	0	0	0	0	0	0	0	0	0	0.120554	0	0	0	0	0	0	0.0636215	0	0	0.0925113	0	0	0.0636215	0	0	0	0	0	0.0357202	0	0	0	0.0357202	0	0	0.0318107	0	0	0.0954322	0	0.0357202	0	0.0318107	0.0318107	0.0318107	0	0
0	0.0317543	0	0	0	0	0	0	0	0	0	0	0.121627	0	0	0	0	0	0	0.0635086	0	0	0.0912429	0	0	0.0635086	0	0	0	0	0	0.0331556	0	0	0	0.0331556	0	0	0.0317543	0	0	0.0952629	0	0.0331556	0	0.0317543	0.0317543	0.0317543	0	0
0	0.0302118	0	0	0	0	0	0	0	0	0	0	0.106918	0	0	0	0	0	0	0.0604236	0	0	0.0784476	0	0	0.0604236	0	0	0	0	0	0.0351547	0	0	0	0.0351547	0	0	0.0302118	0	0	0.0906353	0	0.0351547	0	0.0302118	0.0302118	0.0302118	0	0
0	0.0335219	0	0	0	0	0	0	0	0	0	0	0.137907	0	0	0	0	0	0	0.0670438	0	0	0.0912554	0	0	0.0670438	0	0	0	0	0	0.0293557	0	0	0	0.0293557	0	0	0.0335219	0	0	0.100566	0	0.0293557	0	0.0335219	0.0335219	0.0335219	0	0
0	0.038678	0	0	0	0	0	0	0	0	0	0	0.147194	0	0	0	0	0	0	0.077356	0	0	0.110514	0	0	0.077356	0	0	0	0	0	0.0323334	0	0	0	0.0323334	0	0	0.038678	0	0	0.116034	0	0.0323334	0	0.038678	0.038678	0.038678	0	0
0	0.0375405	0	0	0	0	0	0	0	0	0	0	0.140124	0	0	0	0	0	0	0.0750811	0	0	0.11107	0	0	0.0750811	0	0	0	0	0	0.031108	0	0	0	0.031108	0	0	0.0375405	0	0	0.112622	0	0.031108	0	0.0375405	0.0375405	0.0375405	0	0
0	0.0355259	0	0	0	0	0	0	0	0	0	0	0.144291	0	0	0	0	0	0	0.0710519	0	0	0.115841	0	0	0.0710519	0	0	0	0	0	0.0283126	0	0	0	0.0283126	0	0	0.0355259	0	0	0.106578	0	0.0283126	0	0.0355259	0.0355259	0.0355259	0	0
0	0.0399834	0	0	0	0	0	0	0	0	0	0	0.165427	0	0	0	0	0	0	0.0799668	0	0	0.147799	0	0	0.0799668	0	0	0	0	0	0.032404	0	0	0	0.032404	0	0	0.0399834	0	0	0.11995	0	0.032404	0	0.0399834	0.0399834	0.0399834	0	0
0	0.0447106	0	0	0	0	0	0	0	0	0	0	0.194706	0	0	0	0	0	0	0.0894212	0	0	0.150143	0	0	0.0894212	0	0	0	0	0	0.0444472	0	0	0	0.0444472	0	0	0.0447106	0	0	0.134132	0	0.0444472	0	0.0447106	0.0447106	0.0447106	0	0
0	0.041132	0	0	0	0	0	0	0	0	0	0	0.18604	0	0	0	0	0	0	0.0822641	0	0	0.125287	0	0	0.0822641	0	0	0	0	0	0.0498819	0	0	0	0.0498819	0	0	0.041132	0	0	0.123396	0	0.0498819	0	0.041132	0.041132	0.041132	0	0
0	0.0309307	0	0	0	0	0	0	0	0	0	0	0.130125	0	0	0	0	0	0	0.0618614	0	0	0.081927	0	0	0.0618614	0	0	0	0	0	0.0430304	0	0	0	0.0430304	0	0	0.0309307	0	0	0.0927921	0	0.0430304	0	0.0309307	0.0309307	0.0309307	0	0
[truncated: 439 more columns]
